# Supplementary material
Source: HighWire-hosted journal article supplement (https://www.rcpjournals.org/highwire/filestream/7170/field_highwire_adjunct_files/2/Foster_S3.pdf)
Supplement: Foster_S3.pdf [file Foster_S3.pdf]

## Supplementary tables and figures

### Supplementary Fig 1

EQ-5D-5L scores and time of completion of follow up questionnaire.

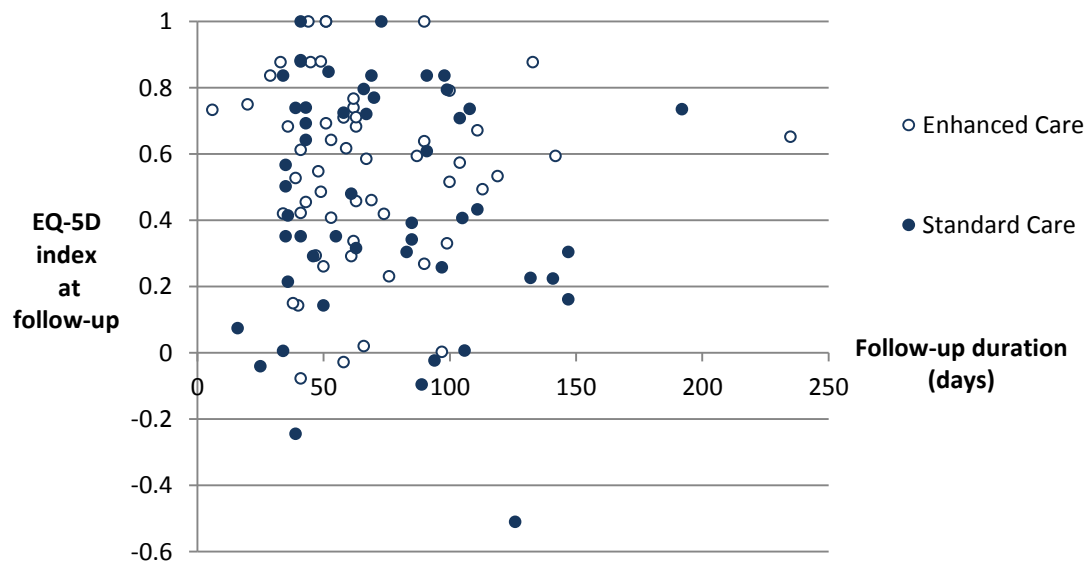

## Supplementary Fig 2

CEAC for the London Homeless Pathway intervention.

CEAC curve based on reasonable assumptions – specifically all staff costs (including wider economic costs are included) and the changes in EQ-5D scores progress smoothly until follow up and then remain constant for a duration given by the difference between the longest duration of follow up and their follow up duration.

The figure shows that if the NHS is willing to pay £20,000 per QALY, there is a 30% chance that the intervention is cost-effective relative to the usual care that homeless patients could expect to receive. This probability rises to 56% and 76% at a willingness to pay of £30,000 and £50,000 per QALY respectively.

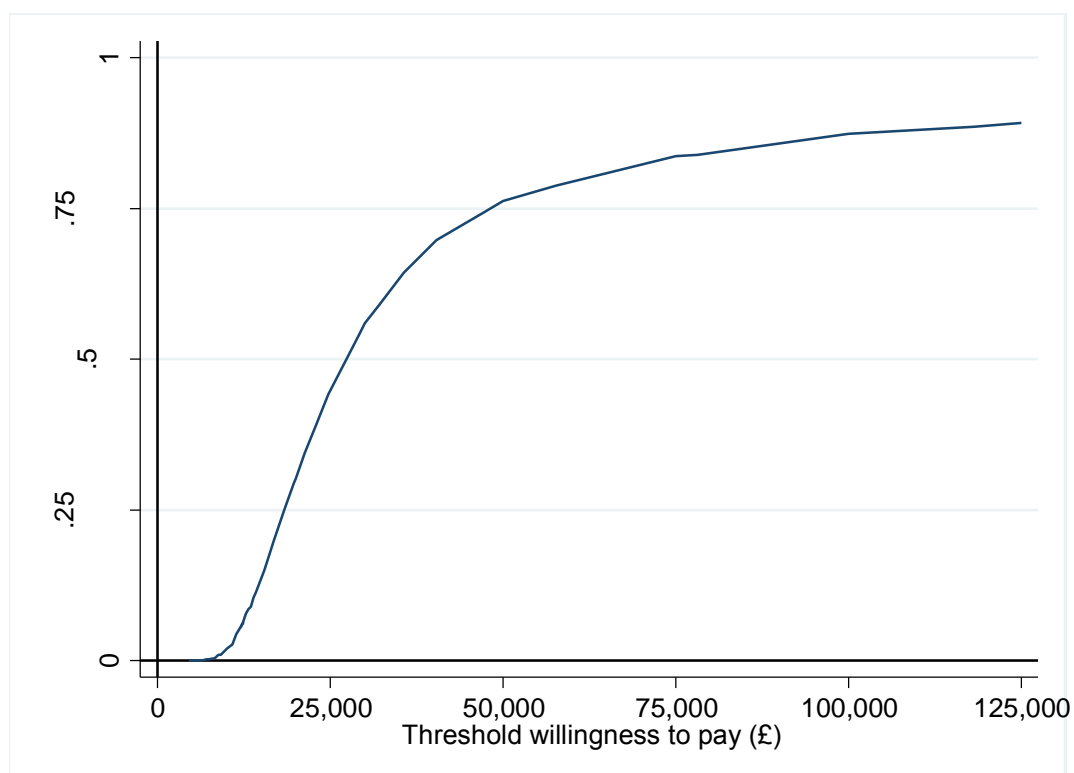

## Supplementary Table 1

Medical and Psychiatric conditions at baseline in homeless patients participating in the study

| Description                                             | Control N | Control % | Intervention N | Intervention % |
|---------------------------------------------------------|-----------|-----------|----------------|----------------|
| <b>Aetiology</b>                                        |           |           |                |                |
| • Infection                                             | 75        | 48.1%     | 64             | 39.3%          |
| • Degenerative Includes coronary artery disease and CVA | 55        | 35.3%     | 61             | 37.4%          |
| • Alcohol related                                       | 36        | 23.1%     | 51             | 31.3%          |
| • Investigation                                         | 36        | 23.1%     | 38             | 23.3%          |
| • Metabolic                                             | 23        | 14.7%     | 22             | 13.5%          |
| • Trauma                                                | 13        | 8.3%      | 16             | 9.8%           |
| • Psychological                                         | 4         | 2.6%      | 10             | 6.1%           |
| • Tumour                                                | 6         | 3.8%      | 6              | 3.7%           |
| • Pregnancy                                             | 1         | 0.6%      | 0              | 0              |
| <b>Organ system</b>                                     |           |           |                |                |
| • Liver                                                 | 50        | 32.1%     | 60             | 36.8%          |
| • Pulmonary                                             | 45        | 28.8%     | 50             | 30.7%          |
| • Musculoskeletal                                       | 30        | 19.2%     | 30             | 18.4%          |
| • CNS                                                   | 29        | 18.6%     | 29             | 17.8%          |
| • CVS                                                   | 28        | 17.9%     | 30             | 18.4%          |
| • Endocrine                                             | 19        | 12.2%     | 20             | 12.3%          |
| • Skin                                                  | 18        | 11.5%     | 17             | 10.4%          |
| • GI                                                    | 15        | 9.6%      | 20             | 12.3%          |
| • GU                                                    | 9         | 5.8%      | 10             | 6.1%           |
| • Haematological                                        | 6         | 3.8%      | 3              | 1.8%           |
| • Other                                                 | 12        | 7.7%      | 6              | 3.7%           |
| <b>Special interest</b>                                 |           |           |                |                |
| • Illicit drugs                                         | 7         | 4.5%      | 22             | 13.5%          |
| • DVT                                                   | 10        | 6.4%      | 12             | 7.4%           |
| • Leg ulcer                                             | 12        | 7.7%      | 9              | 5.5%           |
| <b>Psychiatric disorders</b>                            |           |           |                |                |
| • Depression                                            | 84        | 74.3%     | 91             | 74.0%          |
| • Anxiety                                               | 13        | 11.5%     | 10             | 8.1%           |
| • Schizophrenia                                         | 8         | 7.1%      | 12             | 9.8%           |
| • Psychosis                                             | 9         | 8.0%      | 7              | 5.7%           |
| • Personality Disorder                                  | 7         | 6.2%      | 8              | 6.5%           |
| • PTSD                                                  | 6         | 5.3%      | 4              | 3.3%           |
| • Bipolar                                               | 4         | 3.5%      | 5              | 4.1%           |
| • Suicide                                               | 5         | 4.4%      | 2              | 1.6%           |
| • Drugs                                                 | 1         | 0.9%      | 3              | 2.4%           |
| • Alcohol                                               | 2         | 1.8%      | 1              | 0.8%           |
| • Other                                                 | 15        | 13.3%     | 21             | 17.1%          |

**Supplementary Table 2****Re-attendance at the initial hospital by intervention arm.**

Re-attendances in the Accident and Emergency Department over the three months post discharge (London only) are shown using a logistic regression model adjusting for age and sex as well as re-admissions for both hospitals including all re-admissions or emergency only re-admissions (both analysed using a logistic regression analysis adjusting for age, sex and site).

|                                                                            | Number of patients | Control (%) | Intervention (%) | Adjusted OR (95% CI)   |
|----------------------------------------------------------------------------|--------------------|-------------|------------------|------------------------|
| Attendance to A&E within 90 days of index discharge                        | 310                | 57 (37.0%)  | 58 (37.2%)       | 1.01<br>[0.64 to 1.60] |
|                                                                            |                    |             |                  |                        |
| All re-admissions to hospital within 30 days of index discharge            | 410                | 50 (24.5%)  | 44 (21.4%)       | 0.83<br>[0.52 to 1.33] |
| All re- admissions to hospital within 90 days of index discharge           | 410                | 68 (33.3%)  | 69 (33.5%)       | 1.02<br>[0.67 to 1.54] |
|                                                                            |                    |             |                  |                        |
| Emergency only re-admissions to hospital within 30 days of index discharge | 410                | 41 (20.1%)  | 38 (18.5%)       | 0.90<br>[0.55 to 1.47] |
| Emergency only re- admission to hospital within 90 days of index discharge | 410                | 50 (24.5%)  | 58 (28.2%)       | 1.22<br>[0.78 to 1.90] |

**Supplementary Table 3**

**Baseline comparison of patients with and without 6 weeks follow-up questionnaire**

|                                          | Follow-up questionnaire available |      |               |      | Statistical Test | p-value |
|------------------------------------------|-----------------------------------|------|---------------|------|------------------|---------|
|                                          | No (N = 300)                      |      | Yes (N = 110) |      |                  |         |
|                                          | No.                               | %    | No.           | %    |                  |         |
| Allocated treatment                      |                                   |      |               |      | p( $\chi^2$ )    | 0.699   |
| • Standard care                          | 151                               | 50.3 | 53            | 48.2 |                  |         |
| • GP supported care                      | 149                               | 49.7 | 57            | 51.8 |                  |         |
| Site                                     |                                   |      |               |      | p( $\chi^2$ )    | 0.320   |
| • London                                 | 223                               | 74.3 | 87            | 79.1 |                  |         |
| • Brighton                               | 77                                | 25.7 | 23            | 20.9 |                  |         |
| Mean Age (SD)                            | 42.1 (11.5)                       |      | 42.1 (12.2)   |      | t-test           | >0.999  |
| Gender                                   |                                   |      |               |      | p( $\chi^2$ )    | 0.690   |
| • Male                                   | 243                               | 81   | 91            | 82.7 |                  |         |
| • Female                                 | 57                                | 19   | 19            | 17.3 |                  |         |
| Nationality                              |                                   |      |               |      | p( $\chi^2$ )    | 0.627   |
| • UK                                     | 212                               | 70.7 | 79            | 71.8 |                  |         |
| • EU                                     | 61                                | 20.3 | 21            | 19.1 |                  |         |
| • other                                  | 23                                | 7.7  | 10            | 9.1  |                  |         |
| • Not known                              | 4                                 | 1.3  | 0             | 0    |                  |         |
| Asylum seeker Y/N                        |                                   |      |               |      | p( $\chi^2$ )    | 0.683   |
| • No                                     | 289                               | 96.3 | 107           | 97.3 |                  |         |
| • Yes                                    | 9                                 | 3    | 3             | 2.7  |                  |         |
| • Not known                              | 2                                 | 0.7  | 0             | 0    |                  |         |
| Refugee Y/N                              |                                   |      |               |      | p( $\chi^2$ )    | 0.656   |
| • No                                     | 291                               | 97   | 108           | 98.2 |                  |         |
| • Yes                                    | 7                                 | 2.3  | 2             | 1.8  |                  |         |
| • Not known                              | 2                                 | 0.7  | 0             | 0    |                  |         |
| Any long-term medical conditions?        |                                   |      |               |      | p( $\chi^2$ )    | 0.120   |
| • No                                     | 59                                | 19.7 | 21            | 19.1 |                  |         |
| • Yes                                    | 230                               | 76.7 | 89            | 80.9 |                  |         |
| • Not known                              | 11                                | 3.7  | 0             | 0    |                  |         |
| Any long-term mental health problems?    |                                   |      |               |      | p( $\chi^2$ )    | 0.078   |
| • No                                     | 114                               | 38   | 51            | 46.4 |                  |         |
| • Yes                                    | 177                               | 59   | 59            | 53.6 |                  |         |
| • Not known                              | 9                                 | 3    | 0             | 0    |                  |         |
| Housing status On admission              |                                   |      |               |      | Kruskal's gamma  | 0.082   |
| • Street                                 | 141                               | 47.0 | 37            | 33.6 |                  |         |
| • Unstable address                       | 88                                | 29.3 | 44            | 40   |                  |         |
| • B&B/Hotel                              | 9                                 | 3.0  | 6             | 5.5  |                  |         |
| • Unsupported hostel                     | 10                                | 3.3  | 2             | 1.8  |                  |         |
| • Supported hostel                       | 40                                | 13.3 | 20            | 18.2 |                  |         |
| • Stable address                         | 4                                 | 1.3  | 1             | 0.9  |                  |         |
| • Not known                              | 8                                 | 2.7  | 0             | 0    |                  |         |
| Time since permanent accommodation (cat) |                                   |      |               |      |                  |         |

|                                                                                                                                                                                                     |     |      |    |      |                    |       |
|-----------------------------------------------------------------------------------------------------------------------------------------------------------------------------------------------------|-----|------|----|------|--------------------|-------|
| <ul style="list-style-type: none"> <li>• less than 1 month</li> <li>• 1 to 12 months</li> <li>• 1-5 years</li> <li>• more than 5 years</li> <li>• Not known</li> </ul>                              | 43  | 14.3 | 25 | 22.7 | Kruskal's<br>gamma | 0.077 |
|                                                                                                                                                                                                     | 54  | 18   | 25 | 22.7 |                    |       |
|                                                                                                                                                                                                     | 86  | 28.7 | 26 | 23.6 |                    |       |
|                                                                                                                                                                                                     | 59  | 19.7 | 21 | 19.1 |                    |       |
|                                                                                                                                                                                                     | 58  | 19.3 | 13 | 11.8 |                    |       |
| Number of hospital admission in 12mo                                                                                                                                                                |     |      |    |      |                    |       |
| <ul style="list-style-type: none"> <li>• None</li> <li>• 1</li> <li>• 2 to 9</li> <li>• 10 to 30</li> <li>• Not known</li> </ul>                                                                    | 47  | 15.7 | 13 | 11.8 | Kruskal's<br>gamma | 0.087 |
|                                                                                                                                                                                                     | 74  | 24.7 | 33 | 30   |                    |       |
|                                                                                                                                                                                                     | 147 | 49   | 52 | 47.3 |                    |       |
|                                                                                                                                                                                                     | 14  | 4.7  | 11 | 10   |                    |       |
|                                                                                                                                                                                                     | 18  | 6    | 1  | 0.9  |                    |       |
| Number of nights sleeping rough in 28d                                                                                                                                                              |     |      |    |      |                    |       |
| <ul style="list-style-type: none"> <li>• None</li> <li>• 1 to 6 days</li> <li>• 7 to 13 days</li> <li>• 14 to 20 days</li> <li>• 21 to 27 days</li> <li>• Every day</li> <li>• Not known</li> </ul> | 126 | 42   | 69 | 62.7 | Kruskal's<br>gamma | 0.081 |
|                                                                                                                                                                                                     | 45  | 15   | 13 | 11.8 |                    |       |
|                                                                                                                                                                                                     | 14  | 4.7  | 5  | 4.5  |                    |       |
|                                                                                                                                                                                                     | 19  | 6.3  | 9  | 8.2  |                    |       |
|                                                                                                                                                                                                     | 11  | 3.7  | 2  | 1.8  |                    |       |
|                                                                                                                                                                                                     | 68  | 22.7 | 10 | 9.1  |                    |       |
|                                                                                                                                                                                                     | 17  | 5.7  | 2  | 1.8  |                    |       |
| Median EQ-5D-5L score                                                                                                                                                                               |     |      |    |      |                    |       |

## Supplementary Table 4

Staff costs for the additional staff involved in delivering the intervention

| Cost description                                              | Annual cost per Band 7 nurse | Cost category       |
|---------------------------------------------------------------|------------------------------|---------------------|
| Nursing staff (Band 7)                                        |                              |                     |
| Wages/salary                                                  | £38,800                      | Direct cost         |
| Salary on-costs                                               | £9,667                       | Direct cost         |
| Qualifications                                                | £9,356                       | Wider economic cost |
| Overheads - management, administration and estates staff      | £9,257                       | Wider economic cost |
| Overheads - non-staff                                         | £20,162                      | Wider economic cost |
| Capital overheads                                             | £2,306                       | Wider economic cost |
| <b>Nursing direct costs: per nurse</b>                        | <b>£48,467</b>               |                     |
| <b>Nursing direct costs + wider economic costs: per nurse</b> | <b>£89,548</b>               |                     |
| GP sessions                                                   |                              |                     |
|                                                               | £32,000                      | Direct cost         |
| Additional wider economic costs                               | £21,560                      | Wider economic cost |
| <b>GP direct costs</b>                                        | <b>£32,000</b>               |                     |
| <b>GP total: direct costs + wider economic costs</b>          | <b>£53,560</b>               |                     |

## Supplementary Table 5 – Follow-up health-related quality of life and follow-up duration

|                                         | Follow-up EQ-5D-5L™ score |
|-----------------------------------------|---------------------------|
| <b>Follow-up duration</b>               | -0.00051<br>(-0.62)       |
| <b>Baseline EQ-5D-5L™ score</b>         | 0.218788<br>(2.21)        |
| <b>Constant</b>                         | 0.45136<br>(5.85)         |
| <b>N</b>                                | 103                       |
| <b>F (2, 100)</b>                       | 2.63                      |
| <b>R<sup>2</sup></b>                    | 0.0500                    |
| Figures in parentheses are t-statistics |                           |
